# Supplementary material for: Anti-Inflammatory Effects of RTD-1 in a Murine Model of Chronic Pseudomonas aeruginosa Lung Infection: Inhibition of NF-κB, Inflammasome Gene Expression, and Pro-IL-1β Biosynthesis
Source: MDPI journal article supplement (doi:10.3390/antibiotics10091043), 2021-08-26
Supplement: s1 [file antibiotics-1335612-supplementary.pdf › antibiotics-1335612-supplementary.pdf]

## Supplementary Materials

Anti-inflammatory effects of RTD-1 in a murine model of chronic *Pseudomonas aeruginosa* lung infection: inhibition of NF- $\kappa$ B, inflammasome gene expression, and pro-IL-1 $\beta$  biosynthesis

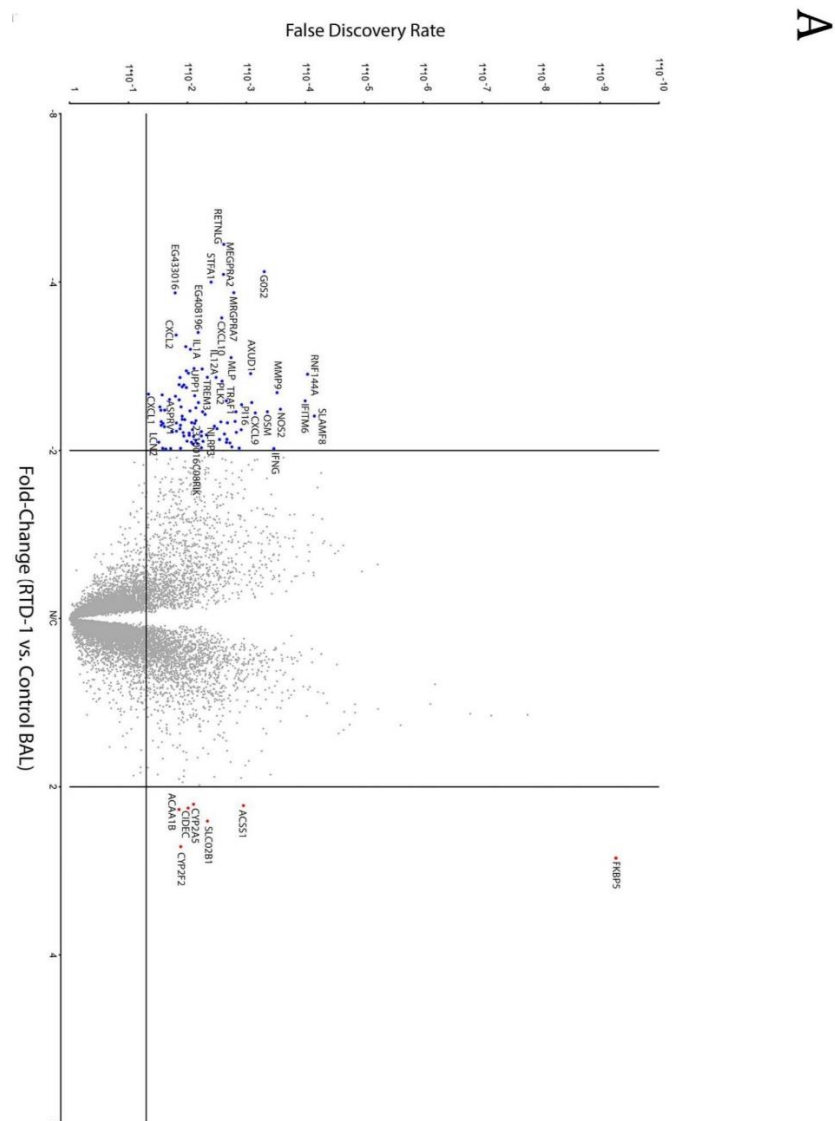

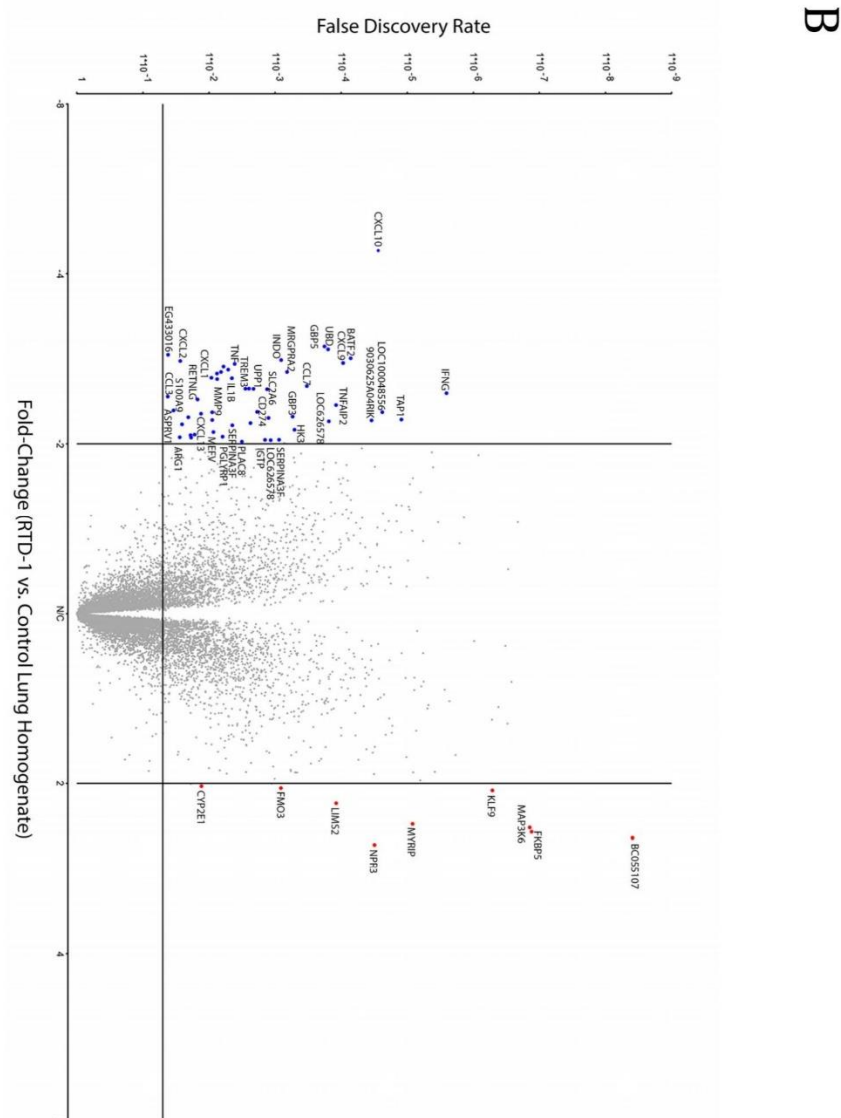

**Figure S1.** Microarray analysis of Lung Tissue and BALF Cells of RTD-1-treated and Saline Control Mice with Chronic *Pseudomonas aeruginosa* Lung Infection. Volcano plots of microarray data for: **A)** BALF cells and **B)** lung tissue homogenates. The horizontal line indicates the cut-off for an unadjusted *p*-value of 0.05; vertical lines indicate the 2-fold differences in both directions. BALF, bronchoalveolar lavage fluid.

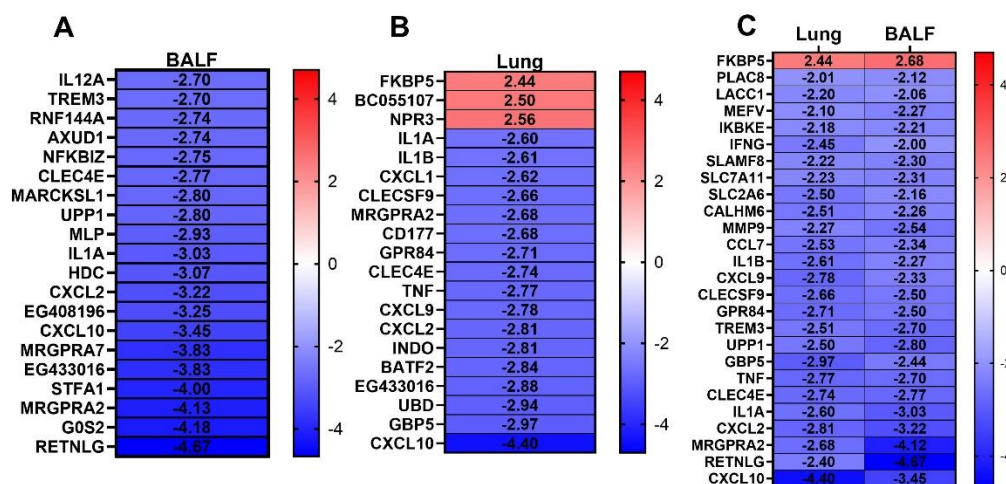

**Figure S2.** Top Up- or Downregulated Genes in Lung Tissue and BALF cells in RTD-1-treated Mice with chronic *P. aeruginosa* lung infection. The top 20 most highly up- or downregulated genes in BALF cells and lung tissue homogenates

following RTD-1 treatment. Blue and red squares indicate down- or upregulation of indicated genes in: **A)** BALF immune cells or **B)** lung tissue homogenates of mice treated with aerosolized RTD-1, compared with saline-treated controls. **C)** The genes commonly altered by RTD-1 treatment in both lung tissue homogenate and BALF cells. BALF, bronchoalveolar lavage fluid.

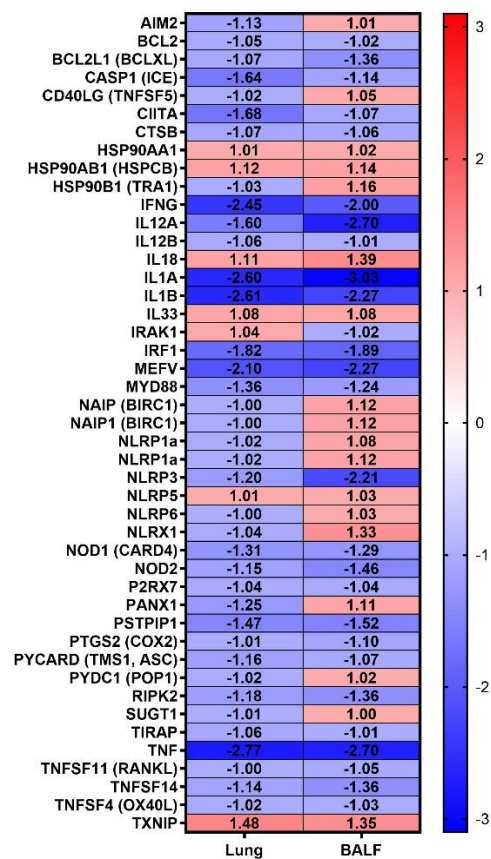

**Figure S3.** Inflammasome-associated Gene Expression Changes in Lung Tissue and BALF in RTD-1-treated Mice with Chronic Infection. Microarray Analysis identified a list of inflammasome-associated gene expression changes due to RTD-1 treatment. Blue and red squares indicate down- or upregulation of indicated genes, respectively.

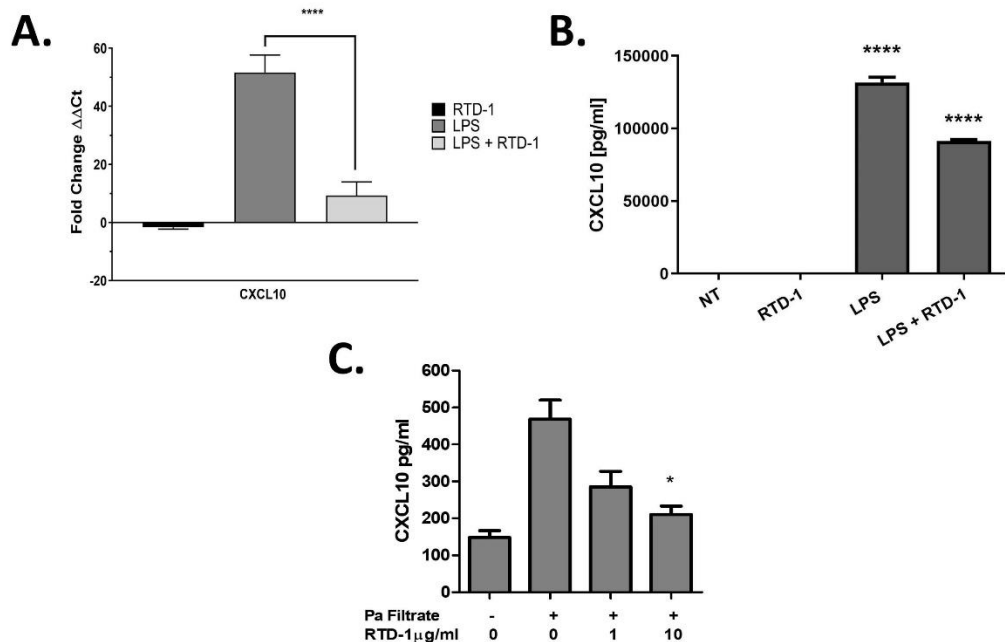

**Figure S4.** RTD-1 Treatment Reduces CXCL10 Transcription and Translation in Different Cell Types. MHS murine alveolar macrophages were stimulated with LPS (100 ng/ml) and RTD-1 (7.14  $\mu\text{g/ml}$ ) for 3 h and CXCL10 **A)** transcription and **B)**

translation was evaluated through qRT-PCR and ELISA, respectively. C) CuFi bronchial epithelial cells were stimulated with *P. aeruginosa* filtrate and cytokine secretion was evaluated. LPS, lipopolysaccharide; Pa, *P. aeruginosa*; NT, No treatment.

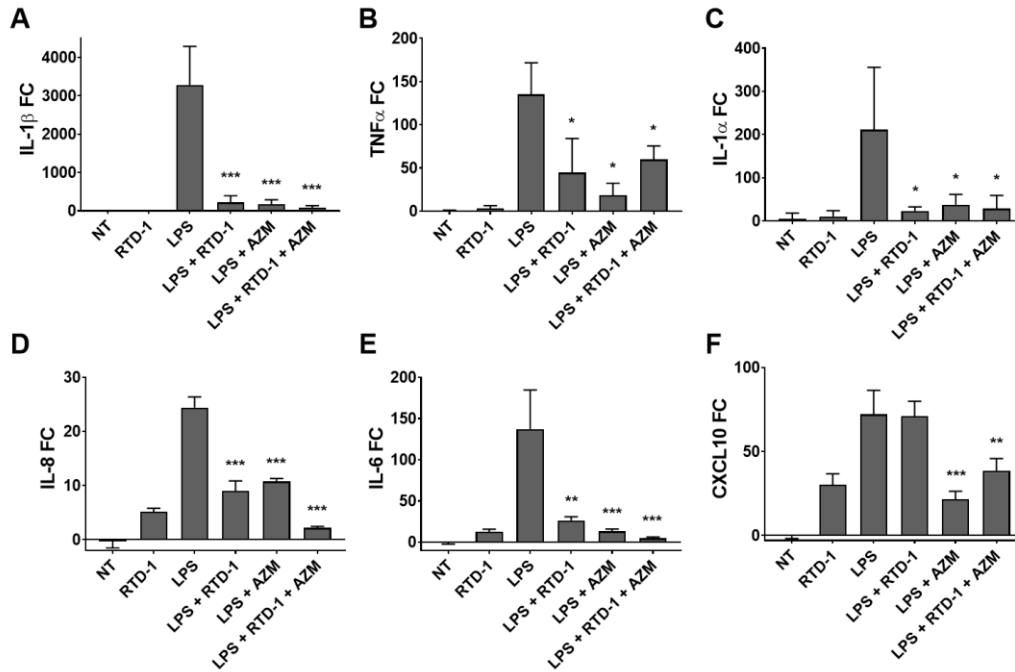

**Figure S5.** Effect of RTD-1 Treatment on Inflammatory Gene Expression. The effect of RTD-1 (7.14  $\mu$ g/ml) on THP-1 monocytes stimulated with 100 ng/ml LPS for 3 h was determined through gene expression analysis of key inflammatory cytokines: **A)** IL-1 $\beta$ , **B)** TNF- $\alpha$ , **C)** IL-1 $\alpha$ , **D)** IL-8, **E)** IL-6 and **F)** CXCL10. Gene expression was quantified using qRT-PCR (n = 3). Treatment differences were analyzed using t-tests after normalization to the housekeeping genes. Mann-Whitney tests were performed for IL-1 $\alpha$  and TNF- $\alpha$  (\*  $p \leq 0.01$ , \*\*  $p \leq 0.001$ , \*\*\*  $p < 0.0001$ ). AZM, azithromycin; FC, fold change; LPS, lipopolysaccharide; NT, No treatment.

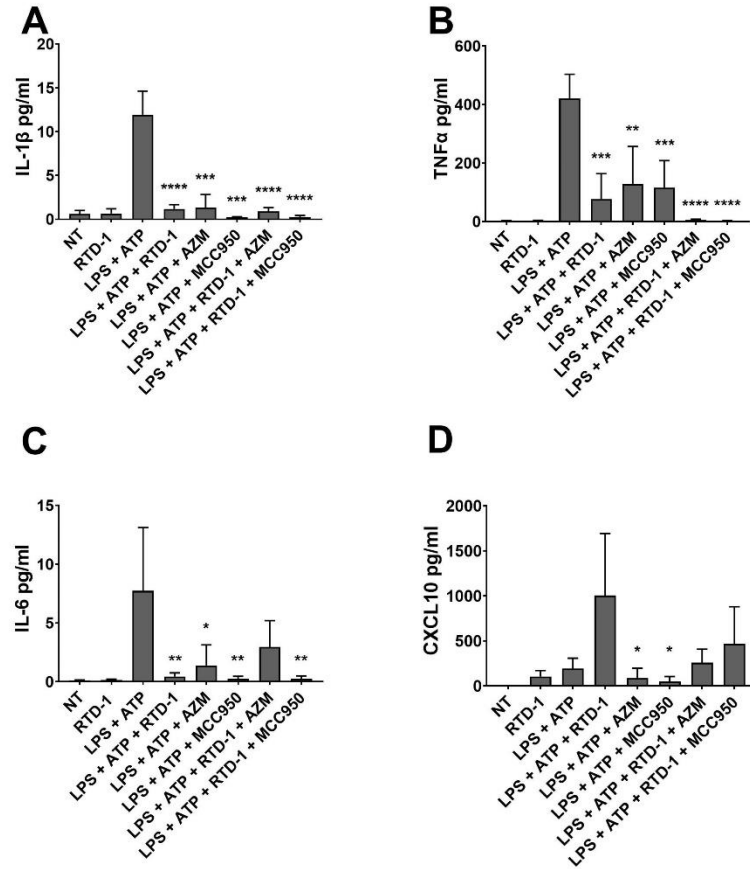

**Figure S6.** Effect of RTD-1 Treatment on Inflammatory Cytokine Release. The effect of RTD-1 (7.14  $\mu$ g/ml) on cytokine expression from THP-1 monocytes stimulated with 100 ng/ml LPS for 24 h: **A**) IL-1 $\beta$ , **B**) TNF- $\alpha$  **C**) IL-6 and **D**) CXCL10. Cytokines were quantified using ELISA (n = 3). Treatment differences were analyzed using parametric t-tests for cytokines IL-1 $\beta$  and TNF- $\alpha$ . For IL-6 and CXCL10, Mann-Whitney tests were performed. (\*  $p \leq 0.05$ , \*\*  $p \leq 0.01$ , \*\*\*  $p \leq 0.001$ , \*\*\*\*  $p \leq 0.0001$ ). ATP, Adenosine triphosphate; AZM, azithromycin; ELISA, enzyme-linked immunosorbent assay; LPS, lipopolysaccharide.

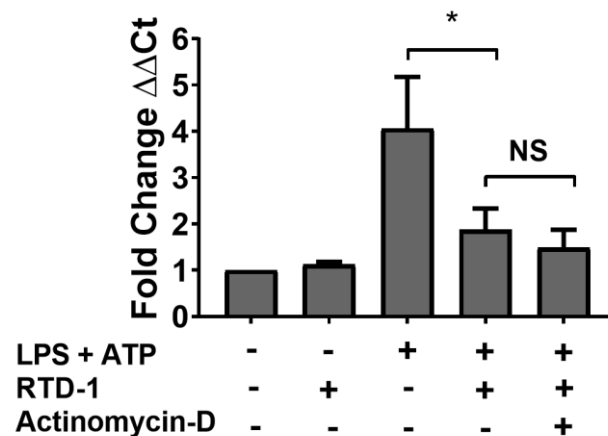

**Figure S7.** RTD-1 Does Not Destabilize NLRP3 mRNA Transcription in THP-1 Macrophages. The x-axis denotes the presence (+) or absence (-) of each compound. NLRP3 mRNA transcription was determined using THP-1 macrophages stimulated with LPS (100 ng/ml) and treated with RTD-1 (7.14  $\mu$ g/ml) for 3 h. A separate set of cells was also exposed to actinomycin-D (5  $\mu$ g/ml) for an additional 45 min. (\*  $p \leq 0.0001$ ). ATP, Adenosine triphosphate; LPS, lipopolysaccharide.

**Table S1.** Forward and reverse primer sequences used in qRT-PCR experiments.

| Primer        | Forward                | Reverse                |
|---------------|------------------------|------------------------|
| GAPDH         | ACAGTTGCCATGTAGACC     | TTGAGCACAGGGTACTTTA    |
| RPL27         | CGTCAATAAGGATGTCTTCAG  | GTTCTTGCCTGTCTTGTATC   |
| NLRP3         | AGGTGTTGGAATTAGACAAC   | AATACATTTTCAGACAACCCC  |
| IL-1 $\beta$  | CTAAACAGATGAAGTGCTCC   | GGTCATTCTCCTGGAAGG     |
| TNF- $\alpha$ | CTATGTCTCAGCCTCTTCTC   | CATTTGGGAACCTCTCATCC   |
| IL-8          | GTTTTTGAAGAGGGCTGAG    | TTTGCTTGAAGTTTCACTGG   |
| IL-6          | GCAGAAAAAGGCAAAGAATC   | CTACATTTGCCGAAGAGC     |
| CXCL10        | CTTCTGAAAGGTGACCAGCC   | GTCGCACCTCCACATAGCTT   |
| IL-18         | CCTTTAAGGAAATGAATCCTCC | CATCTTATTATCATGTCCTGGG |
| IL-1 $\alpha$ | CATAACCCATGATCTGGAAG   | ATTXATGACAACTTCTGCC    |
